# Supplementary material
Source: Springer Nature journal article supplement (https://www.springermedizin.de/resource/supplementary/40248_2014_200_MOESM8_ESM.pdf/9686204)

N° GPs or Specialists

■ GPs ■ Specialists

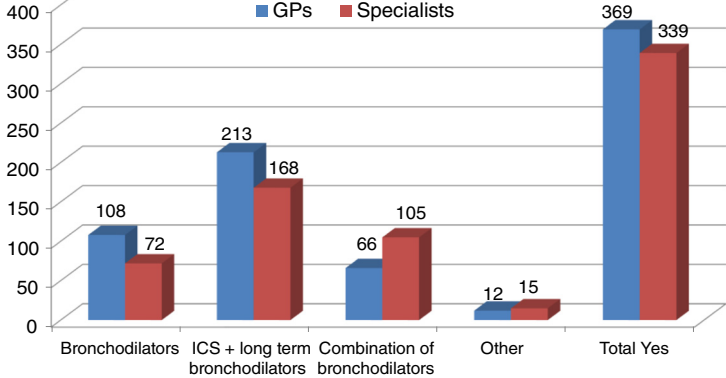

Supplement: MOESM8 [file 9686204]
